# Supplementary material
Source: PubMed Central journal article supplement (PMC4375312)
Supplement: AEM.04265-14_zam999116193so1.pdf [file AEM.04265-14_zam999116193so1.pdf]

1 **Supplemental Material**

2 TABLE S1. Chemical shift assignments for acidocin B.

|               | <b>HN</b> | <b>H<math>\alpha</math></b> | <b>H<math>\beta</math></b> | <b>Others</b>                                                                                                         |
|---------------|-----------|-----------------------------|----------------------------|-----------------------------------------------------------------------------------------------------------------------|
| <b>Ile-1</b>  | 7.95      | 3.81                        | 1.95                       | $\gamma$ CH <sub>3</sub> 0.81, $\gamma$ CH <sub>2</sub> 1.25, 1.54, $\delta$ CH <sub>3</sub> 0.83                     |
| <b>Tyr-2</b>  | 7.75      | 4.27                        | 3.26, 3.09                 | $\delta$ CH 7.20, $\epsilon$ CH 6.83                                                                                  |
| <b>Trp-3</b>  | 8.24      | 4.31                        | 3.63, 3.44                 | $\delta_1$ CH 7.36, $\epsilon$ NH 10.04, $\zeta_2$ CH 7.43, $\eta_2$ CH 7.10, $\zeta_3$ CH 6.94, $\epsilon_3$ CH 7.50 |
| <b>Ile-4</b>  | 8.50      | 3.56                        | 2.12                       | $\gamma$ CH <sub>3</sub> 1.01, $\gamma$ CH <sub>2</sub> 1.33, 2.21, $\delta$ CH <sub>3</sub> 0.98                     |
| <b>Ala-5</b>  | 8.06      | 4.21                        | 1.53                       |                                                                                                                       |
| <b>Asp-6</b>  | 8.08      | 4.37                        | 2.75, 2.63                 |                                                                                                                       |
| <b>Gln-7</b>  | 8.06      | 3.72                        | 1.36                       | $\gamma$ CH <sub>2</sub> 1.00, 1.57, $\epsilon$ NH <sub>2</sub> 6.39, 6.33                                            |
| <b>Phe-8</b>  | 7.83      | 4.55                        | 3.34, 2.83                 | $\delta$ CH 7.33, $\epsilon$ CH 7.23, $\zeta$ CH 7.19                                                                 |
| <b>Gly-9</b>  | 7.86      | 3.98, 3.85                  |                            |                                                                                                                       |
| <b>Ile-10</b> | 7.62      | 4.09                        | 1.68                       | $\gamma$ CH <sub>3</sub> 0.76, $\gamma$ CH <sub>2</sub> 1.10, 1.42, $\delta$ CH <sub>3</sub> 0.79                     |
| <b>His-11</b> | 8.20      |                             | 3.25, 3.07                 |                                                                                                                       |
| <b>Leu-12</b> | 8.12      | 4.45                        | 1.67                       | $\gamma$ CH 1.55, $\delta$ CH <sub>3</sub> 0.88                                                                       |
| <b>Ala-13</b> | 8.26      | 4.43                        | 1.45                       |                                                                                                                       |
| <b>Thr-14</b> | 8.54      | 3.99                        | 4.25                       | $\gamma$ CH <sub>3</sub> 1.27                                                                                         |
| <b>Gly-15</b> | 8.30      | 4.25                        |                            |                                                                                                                       |
| <b>Thr-16</b> | 7.98      | 3.90                        | 4.17                       | $\gamma$ CH <sub>3</sub> 1.47                                                                                         |
| <b>Ala-17</b> | 8.54      | 3.99                        | 1.47                       |                                                                                                                       |
| <b>Arg-18</b> | 7.91      | 3.93                        | 1.91                       | $\gamma$ CH <sub>2</sub> 1.78, 1.68, $\delta$ CH <sub>2</sub> 3.22, 3.30, $\epsilon$ NH 7.20                          |
| <b>Lys-19</b> | 7.75      | 4.13                        | 1.98                       | $\gamma$ CH <sub>2</sub> 1.45, $\delta$ CH <sub>2</sub> 1.61, 1.73, $\epsilon$ CH <sub>2</sub> 2.99                   |
| <b>Leu-20</b> | 7.93      | 4.13                        | 1.86, 1.82                 | $\gamma$ CH 1.64, $\delta$ CH <sub>3</sub> 0.92, 0.89                                                                 |
| <b>Leu-21</b> | 8.17      | 3.99                        | 1.76, 1.69                 | $\gamma$ CH 1.56, $\delta$ CH <sub>3</sub> 0.90, 0.88                                                                 |
| <b>Asp-22</b> | 8.36      | 4.41                        | 2.85, 2.71                 |                                                                                                                       |
| <b>Ala-23</b> | 7.77      | 4.23                        | 1.60                       |                                                                                                                       |
| <b>Val-24</b> | 7.99      | 3.96                        | 2.24                       | $\gamma$ CH <sub>3</sub> 0.98, 1.07                                                                                   |
| <b>Ala-25</b> | 8.31      | 4.28                        | 1.49                       |                                                                                                                       |
| <b>Ser-26</b> | 7.92      | 4.39                        | 4.00, 4.04                 |                                                                                                                       |
| <b>Gly-27</b> | 8.23      | 4.03, 3.96                  |                            |                                                                                                                       |
| <b>Ala-28</b> | 8.04      | 4.37                        | 1.43                       |                                                                                                                       |
| <b>Ser-29</b> | 8.21      | 4.52                        | 3.95                       |                                                                                                                       |
| <b>Leu-30</b> | 8.23      | 4.24                        | 1.76, 1.70                 | $\gamma$ CH 1.56, $\delta$ CH <sub>3</sub> 0.91, 0.86                                                                 |
| <b>Gly-31</b> | 8.40      | 4.01, 3.90                  |                            |                                                                                                                       |
| <b>Thr-32</b> | 7.95      | 4.11                        | 4.28                       | $\gamma$ CH <sub>3</sub> 1.26                                                                                         |
| <b>Ala-33</b> | 8.06      | 4.20                        | 1.42                       |                                                                                                                       |
| <b>Phe-34</b> | 8.24      | 4.34                        | 3.17                       | $\delta$ CH 7.21, $\epsilon$ CH 7.23, $\zeta$ CH 7.16                                                                 |
| <b>Ala-35</b> | 7.95      | 3.99                        | 1.49                       |                                                                                                                       |
| <b>Ala-36</b> | 7.80      | 4.17                        | 1.52                       |                                                                                                                       |
| <b>Ile-37</b> | 7.98      | 3.92                        | 1.96                       | $\gamma$ CH <sub>3</sub> 0.93, $\gamma$ CH <sub>2</sub> 1.69, 1.25, $\delta$ CH <sub>3</sub> 0.86                     |
| <b>Leu-38</b> | 7.64      | 4.14                        | 1.68, 1.63                 | $\gamma$ CH 1.52, $\delta$ CH <sub>3</sub> 0.80, 0.78                                                                 |

|               |      |            |            |                                                                                                                                                           |
|---------------|------|------------|------------|-----------------------------------------------------------------------------------------------------------------------------------------------------------|
| <b>Gly-39</b> | 7.84 | 4.06, 3.85 |            |                                                                                                                                                           |
| <b>Val-40</b> | 7.35 | 4.24       | 2.18       | $\gamma\text{CH}_3$ 0.93, 0.97                                                                                                                            |
| <b>Thr-41</b> | 7.98 | 4.39       | 4.04       | $\gamma\text{CH}_3$ 1.16                                                                                                                                  |
| <b>Leu-42</b> | 8.32 | 4.31       | 1.61       | $\delta\text{CH}_3$ 0.82, 0.74                                                                                                                            |
| <b>Pro-43</b> |      | 4.38       | 2.25, 1.91 | $\gamma\text{CH}_2$ 1.23, 1.01, $\delta\text{CH}_2$ 3.77, 3.01                                                                                            |
| <b>Ala-44</b> | 8.65 | 3.99       | 1.53       |                                                                                                                                                           |
| <b>Trp-45</b> | 7.59 | 4.47       | 3.48, 3.34 | $\delta_1\text{CH}$ 7.55, $\epsilon\text{NH}$ 10.31, $\zeta_2\text{CH}$ 7.44, $\eta_2\text{CH}$ 7.04, $\zeta_3\text{CH}$ 6.88, $\epsilon_3\text{CH}$ 7.27 |
| <b>Ala-46</b> | 6.72 | 3.89       | 0.79       |                                                                                                                                                           |
| <b>Leu-47</b> | 7.31 | 3.98       | 1.71       | $\gamma\text{CH}$ 1.58, $\delta\text{CH}_3$ 0.84, 0.88                                                                                                    |
| <b>Ala-48</b> | 7.95 | 4.18       | 1.54       |                                                                                                                                                           |
| <b>Ala-49</b> | 8.05 | 4.18       | 1.60       |                                                                                                                                                           |
| <b>Ala-50</b> | 8.11 | 4.01       | 1.48       |                                                                                                                                                           |
| <b>Gly-51</b> | 8.13 | 3.94       |            |                                                                                                                                                           |
| <b>Ala-52</b> | 7.92 | 4.01       | 1.49       |                                                                                                                                                           |
| <b>Gly-54</b> | 8.23 | 4.05, 3.95 |            |                                                                                                                                                           |
| <b>Ala-55</b> | 8.04 | 4.22       | 1.86       |                                                                                                                                                           |
| <b>Thr-56</b> | 7.89 | 4.12       | 4.32       | $\gamma\text{CH}_3$ 1.34                                                                                                                                  |
| <b>Ala-57</b> | 8.16 | 4.38       | 1.57       |                                                                                                                                                           |
| <b>Ala-58</b> | 8.23 | 4.31       | 1.50       |                                                                                                                                                           |

3  
4  
5  
6  
7  
8  
9  
10  
11  
12  
13  
14  
15

16

TABLE S2. Structure calculation statistics for acidocin B.

|                                                 |                 |
|-------------------------------------------------|-----------------|
| <b>NOE restraints</b>                           | 909             |
| short-range, $ i-j  \leq 1$                     | 558             |
| medium-range, $1 <  i-j  < 5$                   | 296             |
| long-range, $ i-j  \geq 5$                      | 55              |
| average target function value                   | $0.37 \pm 0.06$ |
| <b>RMSD for residues 1-58 (full peptide)</b>    |                 |
| backbone atoms (Å)                              | $1.48 \pm 0.47$ |
| heavy atoms (Å)                                 | $1.82 \pm 0.50$ |
| <b>RMSD for the <math>\alpha</math>-helices</b> |                 |
| backbone atoms (Å)                              | $1.26 \pm 0.44$ |
| heavy atoms (Å)                                 | $1.47 \pm 0.50$ |
| <b>Ramachandran Plot</b>                        |                 |
| $\Phi/\Psi$ in most favored regions             | 74.6%           |
| $\Phi/\Psi$ in additionally allowed regions     | 25.4%           |
| $\Phi/\Psi$ in generously allowed regions       | 0.0%            |
| $\Phi/\Psi$ in disallowed regions               | 0.0%            |

17

18

19

20

21

22

23

24

25

26

27

28

29

30

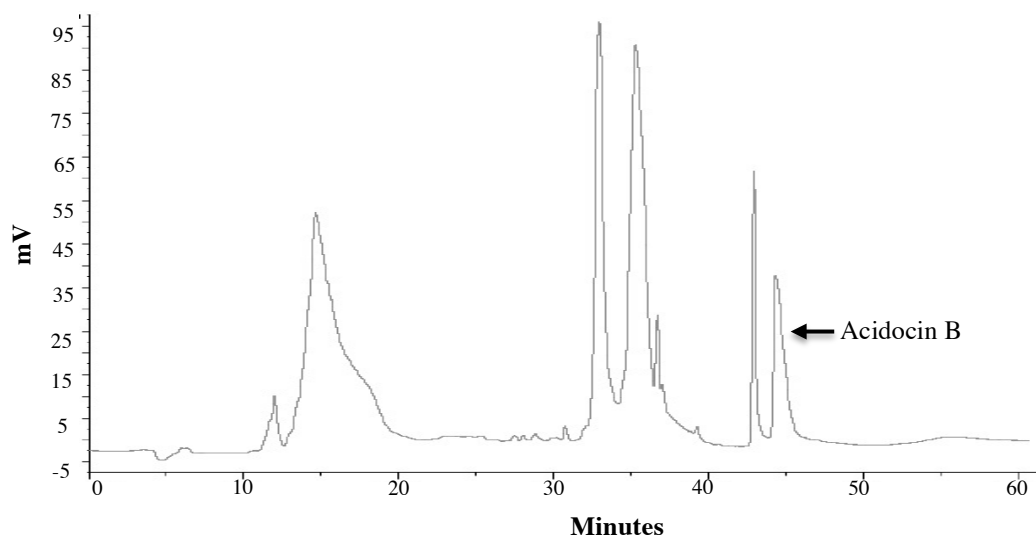

31

32 FIG. S1. RP-HPLC trace of acidocin B from *L. acidophilus* M46. Acidocin B eluted at 44

33 min.

34

35

36

37

38

39

40

41

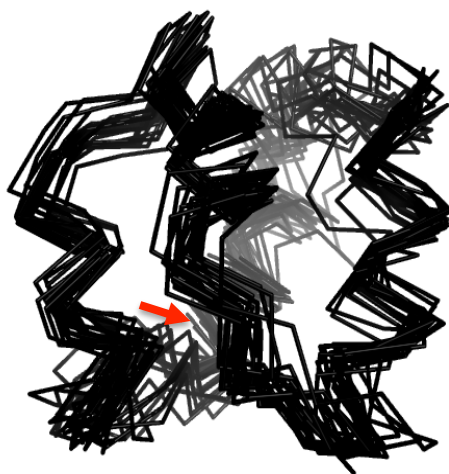

42

43 FIG. S2. Superimposition of the 20 lowest energy conformers calculated for acidocin B. The

44 arrow indicates the linkage of the N- and C-termini.

**Acidocin B**

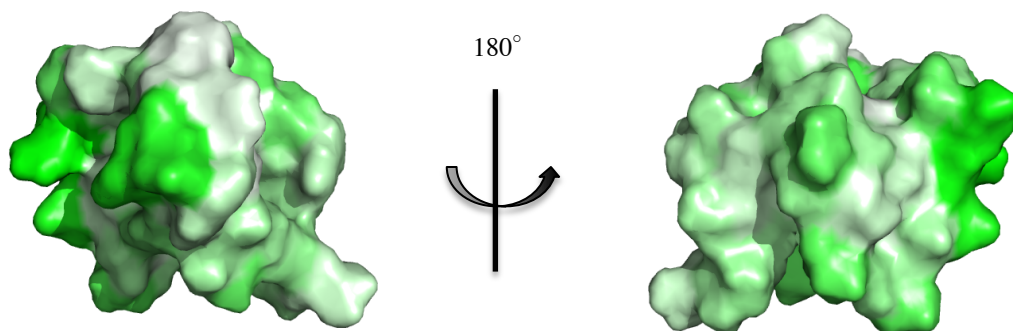

**Gassericin A**

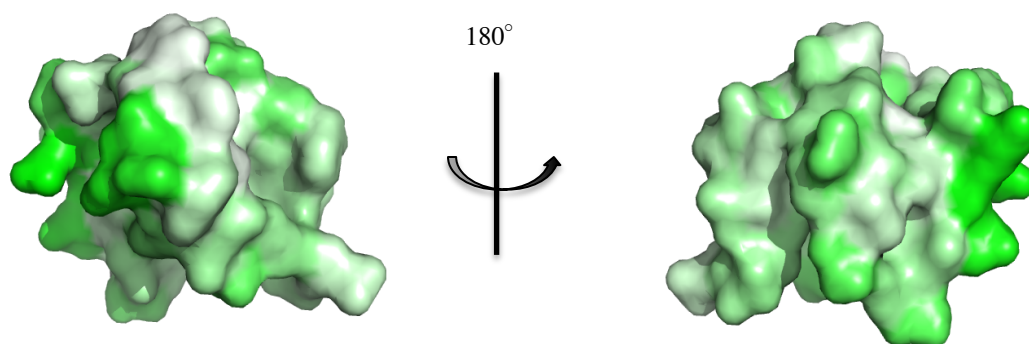

**Butyrivibriocin AR10**

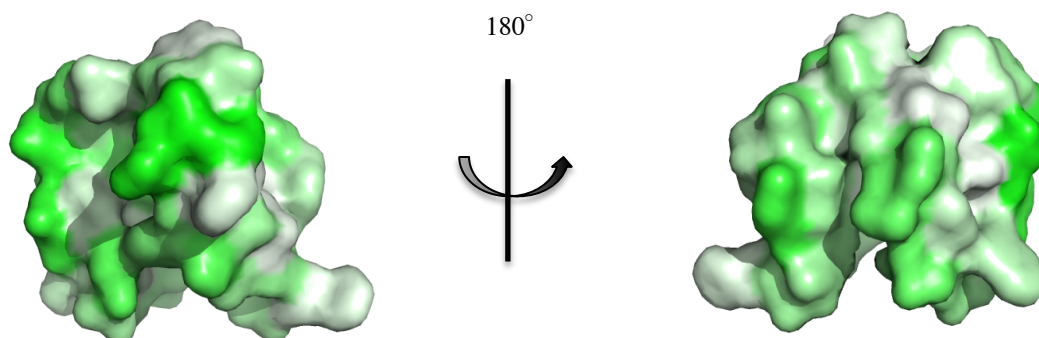

45

46 FIG. S3. Hydrophobic surface maps of the predicted structures of gassericin A and  
47 butyrivibriocin AR10 derived from homology modeling (SWISS-MODEL) (1) using the  
48 structure of acidocin B as template. Structures were generated using PyMOL (2).

49

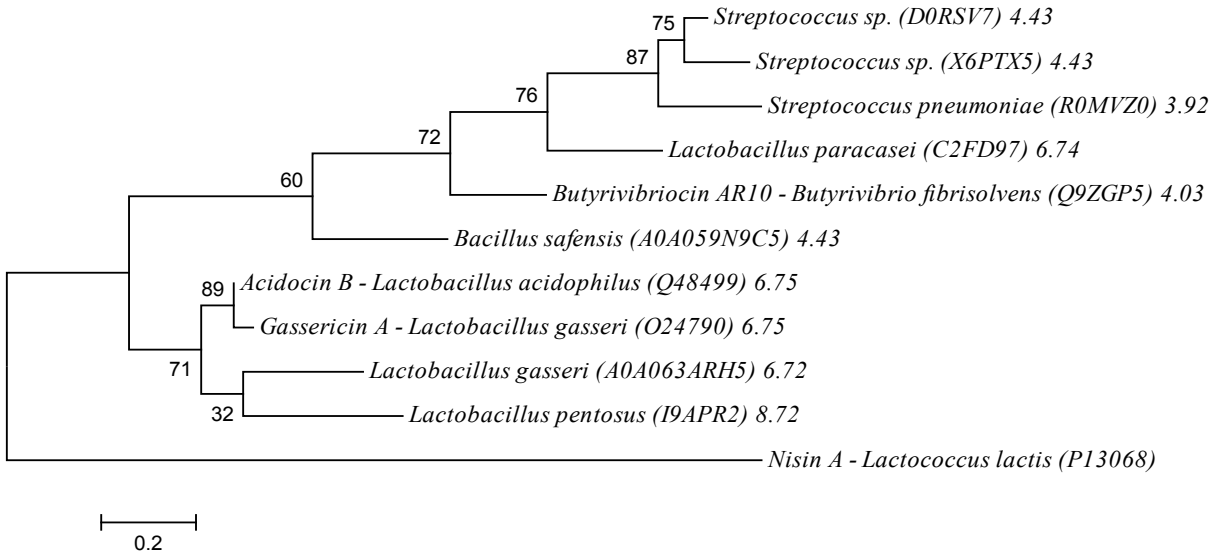

FIG. S4. Molecular phylogenetic analysis of known and putative members of subgroup ii circular bacteriocins with nisin A as outgroup. Acidocin B, gassericin A, and butyrivibriocin AR10 are the known members of this subgroup. Putative members (source organism indicated) were identified through BLAST (3) analysis using acidocin B protein sequence and 40% identity as cut-off. The isoelectric point (pI) of each peptide, as predicted using ExPASy Prot Param tool (4), is indicated at the end of each name. The cleavage site during maturation was predicted through alignment with known bacteriocins and only the mature peptide was considered for calculation of pI. The evolutionary history was inferred by using the maximum likelihood method based on the JTT matrix-based model (5). The tree with the highest log likelihood (-827.3975) is shown. The percentage of trees in which the associated taxa clustered together is shown next to the branches. Initial tree(s) for the heuristic search were obtained automatically by applying Neighbor-Join and BioNJ algorithms to a matrix of pairwise distances estimated using a JTT model, and then selecting the topology with superior log likelihood value. The tree is drawn to scale, with branch lengths measured in the number of substitutions per site. The analysis involved 11 amino acid sequences. All positions containing gaps and missing data were

66 eliminated. There were a total of 49 positions in the final dataset. Evolutionary analyses were  
67 conducted in MEGA6 (6).

68

### References

- 69 **1. Arnold K, Bordoli L, Kopp J, Schwede T.** 2006. The SWISS-MODEL workspace: a  
70 web-based environment for protein structure homology modelling. *Bioinformatics* **22**:195–  
71 201.
- 72 **2. DeLano WL.** 2002. The PyMOL molecular graphics system. DeLano Scientific. San  
73 Carlos, CA.
- 74 **3. Altschul SF, Gish W, Miller W, Myers EW, Lipman DJ.** 1990. Basic local alignment  
75 search tool. *J Mol Biol* **215**:403–410.
- 76 **4. Gasteiger E, Gattiker A, Hoogland C, Ivanyi I, Appel RD, Bairoch A.** 2003. ExPASy:  
77 the proteomics server for in-depth protein knowledge and analysis. *Nucleic Acids Res*  
78 **31**:3784–3788.
- 79 **5. Jones DT, Taylor WR, Thornton JM.** 1992. The rapid generation of mutation data  
80 matrices from protein sequences. *Comput Appl Biosci* **8**:275–282.
- 81 **6. Tamura K, Stecher G, Peterson D, Filipski A, Kumar S.** 2013. MEGA6: Molecular  
82 evolutionary genetics analysis version 6.0. *Mol Biol Evol* **30**:2725–2729.

83
